# Supplementary material for: Parameterizing Spatial Models of Infectious Disease Transmission that Incorporate Infection Time Uncertainty Using Sampling-Based Likelihood Approximations
Source: PubMed Central journal article supplement (PMC4701410; doi:10.1371/journal.pone.0146253), 2016-01-05
Supplement: pone.0146253.s001.pdf [file pone.0146253.s001.pdf]

# Parameterizing Spatial Models of Infectious Disease Transmission that Incorporate Infection Time Uncertainty Using Sampling-Based Likelihood Approximations

Rajat Malik<sup>1</sup>, Rob Deardon<sup>1,2,3</sup>, Grace P.S. Kwong<sup>3</sup>

**1** Department of Mathematics & Statistics, University of Guelph, Guelph, Ontario, Canada

**2** Faculty of Veterinary Medicine, University of Calgary, Calgary, Alberta, Canada

**3** Department of Mathematics & Statistics, University of Calgary, Calgary, Alberta, Canada

## Supporting Information

S1 Table. Summary statistics for the simulation studies.

| Parameter   | $\rho$ | $m$ | $E(\cdot \mathbf{x})$ | $V(\cdot \mathbf{x})$ | Bias $[E(\cdot \mathbf{x})]$ | 95% CI       |
|-------------|--------|-----|-----------------------|-----------------------|------------------------------|--------------|
| $\alpha$    | –      | –   | 1.46                  | 0.05                  | 0.06                         | [1.05, 1.87] |
|             | 0.25   | –   | 0.84                  | 0.16                  | –0.61                        | [0.18, 1.64] |
|             | 0.50   | –   | 1.09                  | 0.10                  | –0.36                        | [0.51, 1.73] |
|             | 0.75   | –   | 1.32                  | 0.08                  | –0.14                        | [0.78, 1.89] |
|             | 0.90   | –   | 1.45                  | 0.08                  | 0.05                         | [0.94, 2.01] |
|             | 0.10   | 4   | 1.24                  | 0.18                  | –0.22                        | [0.49, 2.15] |
|             | 0.50   | 4   | 1.29                  | 0.17                  | –0.17                        | [0.54, 2.12] |
|             | 0.10   | 9   | 1.24                  | 0.09                  | –0.21                        | [0.75, 1.97] |
|             | 0.50   | 9   | 1.34                  | 0.08                  | –0.12                        | [0.80, 1.89] |
|             | 0.10   | 16  | 1.39                  | 0.06                  | –0.07                        | [0.96, 1.92] |
|             | 0.50   | 16  | 1.44                  | 0.05                  | –0.02                        | [1.02, 1.88] |
| $\beta$     | –      | –   | 2.32                  | 0.01                  | 0.02                         | [2.13, 2.51] |
|             | 0.25   | –   | 1.56                  | 0.62                  | –0.75                        | [0.28, 3.10] |
|             | 0.50   | –   | 1.64                  | 0.30                  | –0.28                        | [0.67, 2.71] |
|             | 0.75   | –   | 1.83                  | 0.22                  | –0.49                        | [0.98, 2.76] |
|             | 0.90   | –   | 2.24                  | 0.21                  | –0.08                        | [1.35, 3.21] |
|             | 0.10   | 4   | 1.93                  | 0.17                  | –0.39                        | [1.49, 2.48] |
|             | 0.50   | 4   | 2.07                  | 0.06                  | –0.25                        | [1.62, 2.54] |
|             | 0.10   | 9   | 2.11                  | 0.04                  | –0.21                        | [1.80, 2.52] |
|             | 0.50   | 9   | 2.26                  | 0.03                  | –0.05                        | [1.95, 2.59] |
|             | 0.10   | 16  | 2.20                  | 0.04                  | –0.12                        | [1.97, 2.64] |
|             | 0.50   | 16  | 2.37                  | 0.02                  | 0.04                         | [2.13, 2.62] |
| $\lambda_z$ | –      | –   | 0.33                  | $1.09 \times 10^{-3}$ | 0.00                         | [0.27, 0.39] |
|             | 0.25   | –   | 0.19                  | $5.24 \times 10^{-3}$ | –0.14                        | [0.06, 0.33] |
|             | 0.50   | –   | 0.26                  | $3.56 \times 10^{-3}$ | –0.07                        | [0.15, 0.37] |
|             | 0.75   | –   | 0.29                  | $2.67 \times 10^{-3}$ | –0.04                        | [0.19, 0.39] |
|             | 0.90   | –   | 0.33                  | $2.52 \times 10^{-3}$ | $1.43 \times 10^{-3}$        | [0.23, 0.43] |
|             | 0.10   | 4   | 0.23                  | $2.57 \times 10^{-3}$ | –0.10                        | [0.15, 0.42] |
|             | 0.50   | 4   | 0.25                  | $2.16 \times 10^{-3}$ | –0.08                        | [0.17, 0.35] |
|             | 0.10   | 9   | 0.24                  | $9.34 \times 10^{-3}$ | –0.09                        | [0.18, 0.38] |
|             | 0.50   | 9   | 0.29                  | $1.10 \times 10^{-3}$ | –0.04                        | [0.23, 0.35] |
|             | 0.10   | 16  | 0.27                  | $6.89 \times 10^{-4}$ | –0.06                        | [0.22, 0.32] |
|             | 0.50   | 16  | 0.32                  | $6.86 \times 10^{-4}$ | $-4.09 \times 10^{-4}$       | [0.27, 0.37] |
