# Supplementary material for: Parameterizing Spatial Models of Infectious Disease Transmission that Incorporate Infection Time Uncertainty Using Sampling-Based Likelihood Approximations
Source: PubMed Central journal article supplement (PMC4701410; doi:10.1371/journal.pone.0146253), 2016-01-05
Supplement: pone.0146253.s002.pdf [file pone.0146253.s002.pdf]

# Parameterizing Spatial Models of Infectious Disease Transmission that Incorporate Infection Time Uncertainty Using Sampling-Based Likelihood Approximations

Rajat Malik<sup>1</sup>, Rob Deardon<sup>1,2,3</sup>, Grace P.S. Kwong<sup>3</sup>

**1 Department of Mathematics & Statistics, University of Guelph, Guelph, Ontario, Canada**

**2 Faculty of Veterinary Medicine, University of Calgary, Calgary, Alberta, Canada**

**3 Department of Mathematics & Statistics, University of Calgary, Calgary, Alberta, Canada**

## Supporting Information

S2 Table. Summary statistics for modeling the FMD-ILM.

| Parameter   | $\rho$ | m  | $E(\cdot \mathbf{x})$ | $V(\cdot \mathbf{x})$  | 95% Credible Interval                         |
|-------------|--------|----|-----------------------|------------------------|-----------------------------------------------|
| $\alpha_c$  | -      | -  | $6.12 \times 10^{-7}$ | $1.54 \times 10^{-14}$ | $[4.06 \times 10^{-7}, 8.69 \times 10^{-7}]$  |
|             | 0.25   | -  | $4.87 \times 10^{-7}$ | $1.35 \times 10^{-13}$ | $[2.75 \times 10^{-11}, 1.19 \times 10^{-6}]$ |
|             | 0.50   | -  | $4.27 \times 10^{-7}$ | $1.03 \times 10^{-13}$ | $[1.20 \times 10^{-12}, 1.05 \times 10^{-6}]$ |
|             | 0.75   | -  | $4.19 \times 10^{-7}$ | $9.95 \times 10^{-14}$ | $[9.30 \times 10^{-12}, 1.03 \times 10^{-6}]$ |
|             | 0.90   | -  | $4.46 \times 10^{-7}$ | $9.11 \times 10^{-14}$ | $[2.99 \times 10^{-12}, 10 \times 10^{-6}]$   |
|             | 0.50   | 4  | $3.52 \times 10^{-7}$ | $6.28 \times 10^{-14}$ | $[1.17 \times 10^{-10}, 8.29 \times 10^{-7}]$ |
|             | 0.50   | 9  | $4.42 \times 10^{-7}$ | $5.84 \times 10^{-14}$ | $[4.95 \times 10^{-11}, 8.54 \times 10^{-7}]$ |
|             | 0.50   | 16 | $5.45 \times 10^{-7}$ | $2.27 \times 10^{-14}$ | $[2.47 \times 10^{-7}, 8.37 \times 10^{-7}]$  |
| $\phi_s$    | -      | -  | $5.26 \times 10^{-6}$ | $1.98 \times 10^{-11}$ | $[6.21 \times 10^{-11}, 1.41 \times 10^{-5}]$ |
|             | 0.25   | -  | $1.34 \times 10^{-5}$ | $1.04 \times 10^{-10}$ | $[1.12 \times 10^{-9}, 3.30 \times 10^{-5}]$  |
|             | 0.50   | -  | $1.12 \times 10^{-5}$ | $7.22 \times 10^{-11}$ | $[1.56 \times 10^{-9}, 2.78 \times 10^{-5}]$  |
|             | 0.75   | -  | $7.55 \times 10^{-6}$ | $3.27 \times 10^{-11}$ | $[8.97 \times 10^{-11}, 1.86 \times 10^{-5}]$ |
|             | 0.90   | -  | $8.64 \times 10^{-6}$ | $4.15 \times 10^{-11}$ | $[3.91 \times 10^{-10}, 2.10 \times 10^{-5}]$ |
|             | 0.50   | 4  | $7.21 \times 10^{-6}$ | $2.84 \times 10^{-11}$ | $[7.21 \times 10^{-11}, 1.75 \times 10^{-5}]$ |
|             | 0.50   | 9  | $6.10 \times 10^{-6}$ | $1.89 \times 10^{-11}$ | $[2.04 \times 10^{-9}, 1.42 \times 10^{-5}]$  |
|             | 0.50   | 16 | $6.18 \times 10^{-6}$ | $1.90 \times 10^{-11}$ | $[7.48 \times 10^{-10}, 1.44 \times 10^{-5}]$ |
| $\phi_c$    | -      | -  | $2.42 \times 10^{-4}$ | $3.03 \times 10^{-9}$  | $[1.41 \times 10^{-4}, 3.53 \times 10^{-4}]$  |
|             | 0.25   | -  | $1.70 \times 10^{-4}$ | $1.63 \times 10^{-8}$  | $[4.35 \times 10^{-9}, 4.17 \times 10^{-4}]$  |
|             | 0.50   | -  | $1.99 \times 10^{-4}$ | $2.04 \times 10^{-8}$  | $[7.57 \times 10^{-9}, 4.69 \times 10^{-4}]$  |
|             | 0.75   | -  | $1.86 \times 10^{-4}$ | $1.13 \times 10^{-8}$  | $[4.12 \times 10^{-8}, 3.71 \times 10^{-4}]$  |
|             | 0.90   | -  | $2.12 \times 10^{-4}$ | $1.29 \times 10^{-8}$  | $[2.17 \times 10^{-7}, 4.06 \times 10^{-4}]$  |
|             | 0.50   | 4  | $20 \times 10^{-4}$   | $7.83 \times 10^{-9}$  | $[1.45 \times 10^{-5}, 3.57 \times 10^{-4}]$  |
|             | 0.50   | 9  | $2.16 \times 10^{-4}$ | $4.66 \times 10^{-9}$  | $[8.83 \times 10^{-5}, 3.54 \times 10^{-4}]$  |
|             | 0.50   | 16 | $2.20 \times 10^{-4}$ | $2.32 \times 10^{-9}$  | $[1.24 \times 10^{-4}, 3.12 \times 10^{-4}]$  |
| $\beta$     | -      | -  | $1.54 \times 10^{-0}$ | $1.79 \times 10^{-3}$  | $[1.45 \times 10^{-0}, 1.62 \times 10^{-0}]$  |
|             | 0.25   | -  | $1.11 \times 10^{-0}$ | $6.02 \times 10^{-2}$  | $[6.33 \times 10^{-1}, 1.59 \times 10^{-0}]$  |
|             | 0.50   | -  | $1.18 \times 10^{-0}$ | $3.22 \times 10^{-2}$  | $[8.29 \times 10^{-1}, 1.53 \times 10^{-0}]$  |
|             | 0.75   | -  | $1.34 \times 10^{-0}$ | $2.71 \times 10^{-2}$  | $[1.01 \times 10^{-0}, 1.66 \times 10^{-0}]$  |
|             | 0.90   | -  | $1.41 \times 10^{-0}$ | $7.95 \times 10^{-3}$  | $[1.24 \times 10^{-0}, 1.59 \times 10^{-0}]$  |
|             | 0.50   | 4  | $1.33 \times 10^{-0}$ | $1.85 \times 10^{-2}$  | $[1.07 \times 10^{-0}, 1.60 \times 10^{-0}]$  |
|             | 0.50   | 9  | $1.38 \times 10^{-0}$ | $1.23 \times 10^{-2}$  | $[1.16 \times 10^{-0}, 1.59 \times 10^{-0}]$  |
|             | 0.50   | 16 | $1.46 \times 10^{-0}$ | $1.10 \times 10^{-2}$  | $[1.26 \times 10^{-0}, 1.67 \times 10^{-0}]$  |
| $\epsilon$  | -      | -  | $6.58 \times 10^{-3}$ | $4.46 \times 10^{-7}$  | $[5.25 \times 10^{-3}, 7.87 \times 10^{-3}]$  |
|             | 0.25   | -  | $2.41 \times 10^{-3}$ | $3.29 \times 10^{-6}$  | $[5.37 \times 10^{-7}, 5.92 \times 10^{-3}]$  |
|             | 0.50   | -  | $2.90 \times 10^{-3}$ | $4.04 \times 10^{-6}$  | $[1.19 \times 10^{-7}, 6.63 \times 10^{-3}]$  |
|             | 0.75   | -  | $3.40 \times 10^{-3}$ | $3.41 \times 10^{-6}$  | $[1.51 \times 10^{-6}, 6.61 \times 10^{-3}]$  |
|             | 0.90   | -  | $5.57 \times 10^{-3}$ | $9.97 \times 10^{-7}$  | $[3.62 \times 10^{-3}, 7.52 \times 10^{-3}]$  |
|             | 0.50   | 4  | $5.16 \times 10^{-3}$ | $2.99 \times 10^{-6}$  | $[1.88 \times 10^{-3}, 8.67 \times 10^{-3}]$  |
|             | 0.50   | 9  | $4.96 \times 10^{-3}$ | $2.41 \times 10^{-6}$  | $[2.03 \times 10^{-3}, 8.15 \times 10^{-3}]$  |
|             | 0.50   | 16 | $6.04 \times 10^{-3}$ | $8.20 \times 10^{-7}$  | $[4.29 \times 10^{-3}, 7.85 \times 10^{-3}]$  |
| $\lambda_z$ | -      | -  | $8.23 \times 10^{-2}$ | $6.21 \times 10^{-5}$  | $[6.68 \times 10^{-2}, 9.76 \times 10^{-2}]$  |
|             | 0.25   | -  | $2.93 \times 10^{-2}$ | $4.74 \times 10^{-4}$  | $[1.73 \times 10^{-7}, 7.11 \times 10^{-2}]$  |
|             | 0.50   | -  | $5.43 \times 10^{-2}$ | $6.10 \times 10^{-4}$  | $[4.70 \times 10^{-3}, 9.97 \times 10^{-2}]$  |
|             | 0.75   | -  | $5.02 \times 10^{-2}$ | $2.56 \times 10^{-4}$  | $[1.90 \times 10^{-2}, 8.22 \times 10^{-2}]$  |
|             | 0.90   | -  | $7.37 \times 10^{-2}$ | $4.26 \times 10^{-4}$  | $[3.19 \times 10^{-2}, 1.12 \times 10^{-1}]$  |
|             | 0.50   | 4  | $7.09 \times 10^{-2}$ | $1.92 \times 10^{-4}$  | $[4.36 \times 10^{-2}, 9.75 \times 10^{-2}]$  |
|             | 0.50   | 9  | $7.44 \times 10^{-2}$ | $1.44 \times 10^{-4}$  | $[5.11 \times 10^{-2}, 9.81 \times 10^{-2}]$  |
|             | 0.50   | 16 | $7.70 \times 10^{-2}$ | $8.39 \times 10^{-5}$  | $[5.91 \times 10^{-2}, 9.51 \times 10^{-2}]$  |
